# Supplementary material
Source: Springer Nature journal article supplement (http://www.nature.com/msb/journal/v1/n1/extref/msb4100004-s7.pdf)
Supplement: msb4100004-s7.pdf [file msb4100004-s7.pdf]

**a**

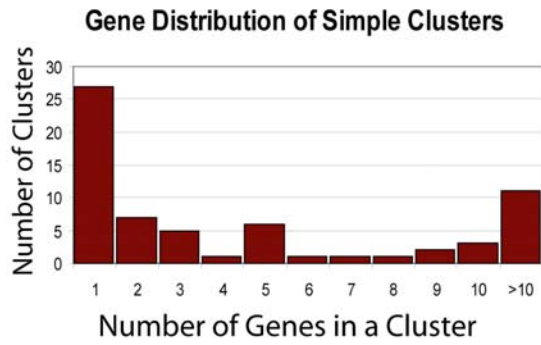

**b**

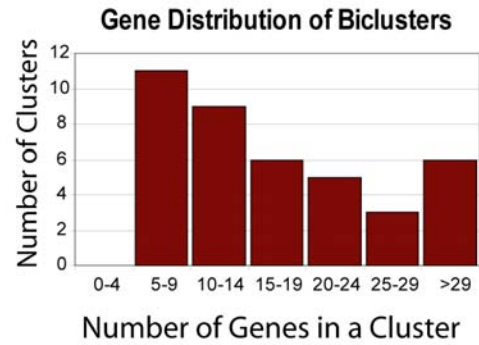

**Supplementary Figure 7.** Gene distribution in simple clusters and biclusters. **(a)**The majority of simple clusters (one or two phenotypes) contain between 1 and 10 genes. **(b)**Biclusters (three or more phenotypes) are more populated than simple clusters, with most containing between 5-29 members.
